# Supplementary material for: Bandgap engineering of Fe2O3 with Cr – application to photoelectrochemical oxidation
Source: Royal Society of Chemistry journal article supplement (doi:10.1039/c5cp05154a), 2015-12-08
Supplement: c5cp05154a1.pdf [file c5cp05154a1.pdf]

**Supplementary Information for:**  
**Bandgap engineering of Fe<sub>2</sub>O<sub>3</sub> with Cr – Application to photoelectrochemical  
oxidation**

William D. Chemelewski<sup>a</sup>, Oluwaniyi Mabayoje<sup>b</sup>, Ding Tang<sup>c</sup>, Alexander J. E. Rettie<sup>c</sup>, C.  
Buddie Mullins<sup>a,b,c</sup>

*<sup>a</sup>Texas Materials Institute,*

*<sup>b</sup>Department of Chemistry,*

*<sup>c</sup>McKetta Department of Chemical Engineering  
University of Texas at Austin*

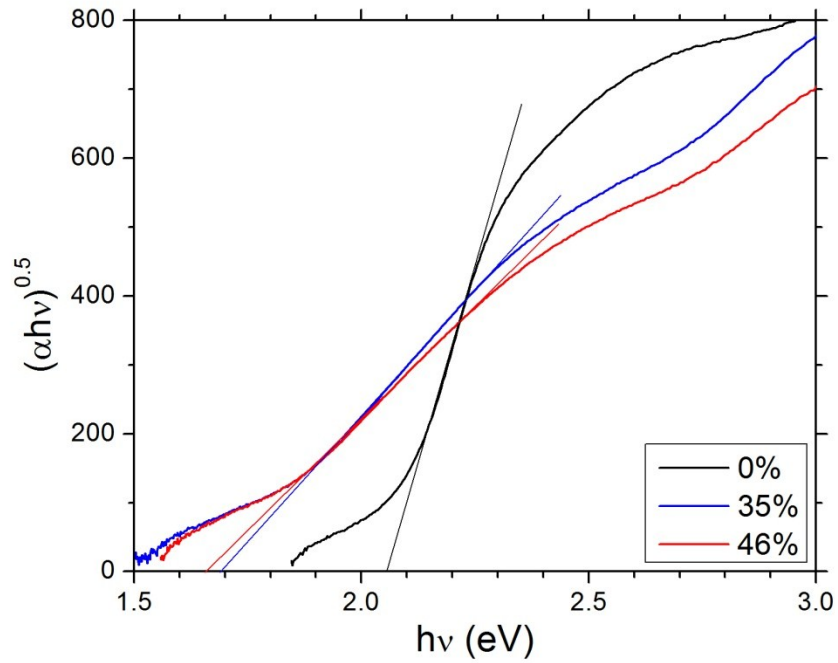

**Figure S1.** Indirect gap Tauc analysis for a few Cr-doped films.

**Figure S2.** Direct gap Tauc analysis for a few Cr-doped films.

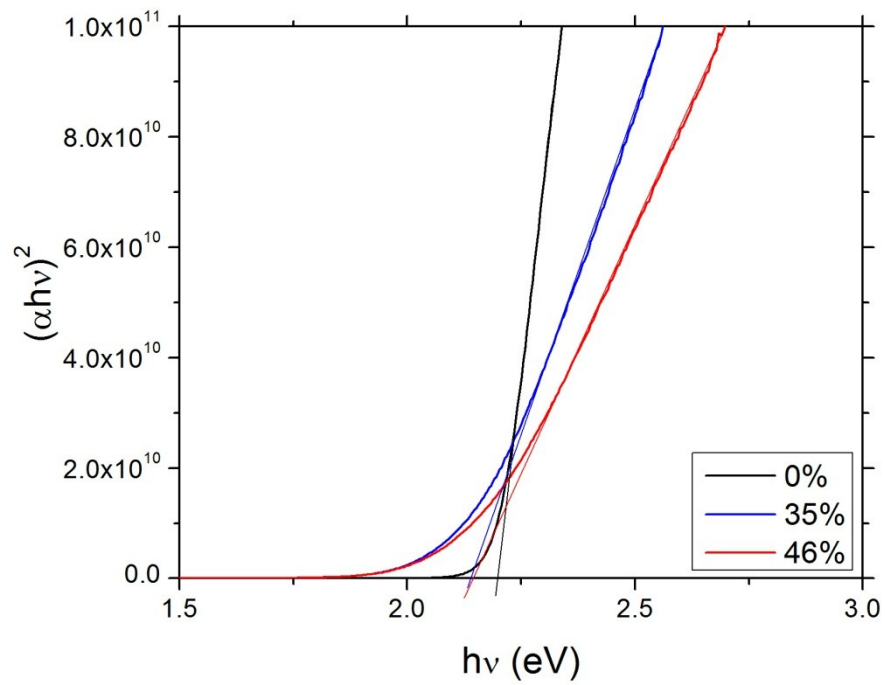

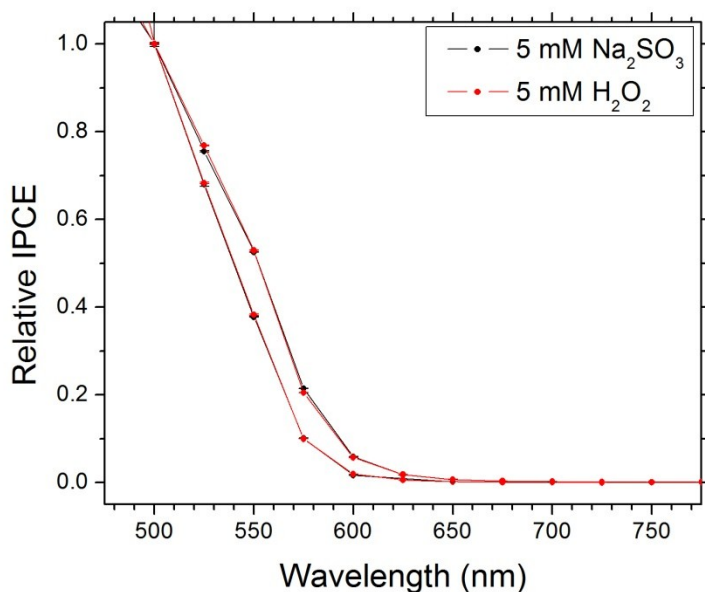

**Figure S3.** Comparison of relative IPCE traces for two different films using either Na<sub>2</sub>SO<sub>3</sub> or H<sub>2</sub>O<sub>2</sub> as the hole scavenger. As can be seen they almost lay right on top of each other so either scavenger is appropriate for use. Na<sub>2</sub>SO<sub>3</sub> was chosen because it gave lower dark currents.

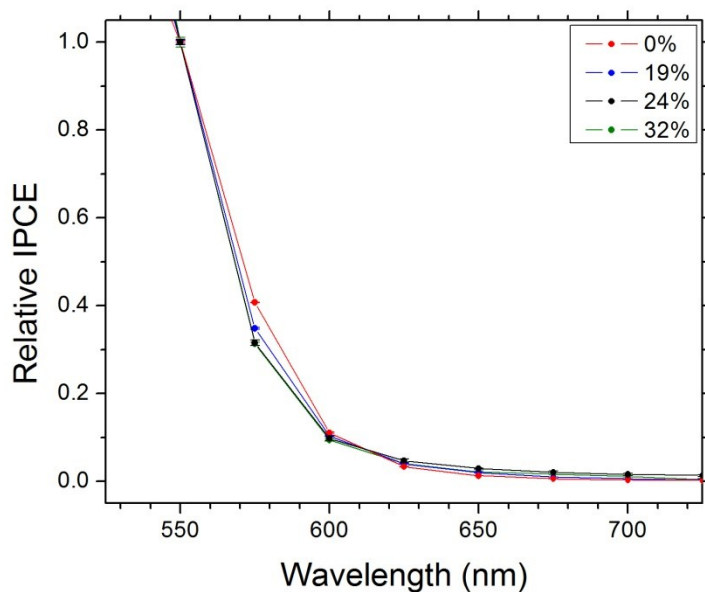

**Figure S4.** Relative IPCE plot of same films see in Figure 4, but instead of 500 nm response used for normalization the 550 nm response is used.

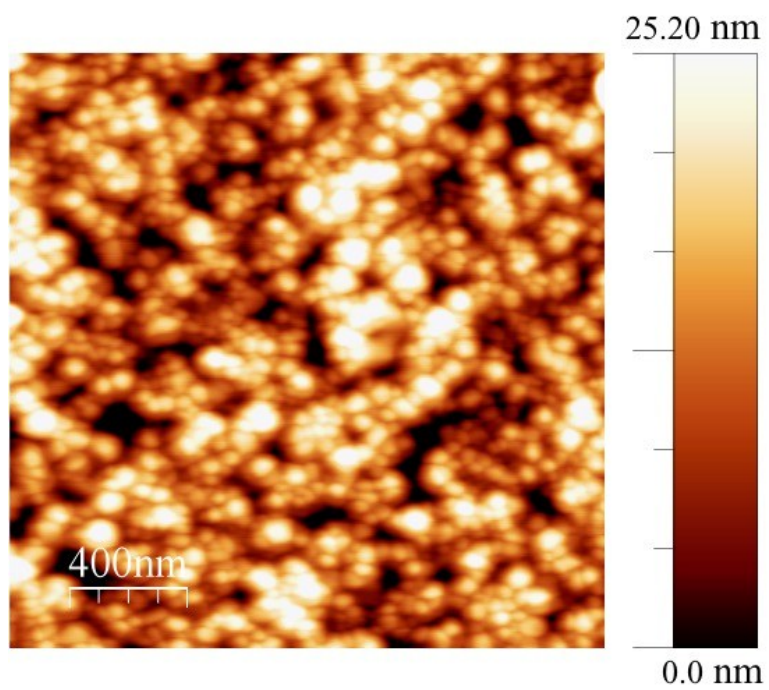

**Figure S5.** AFM image of polycrystalline  $\text{Fe}_2\text{O}_3$  on FTO used for IPCE measurements.

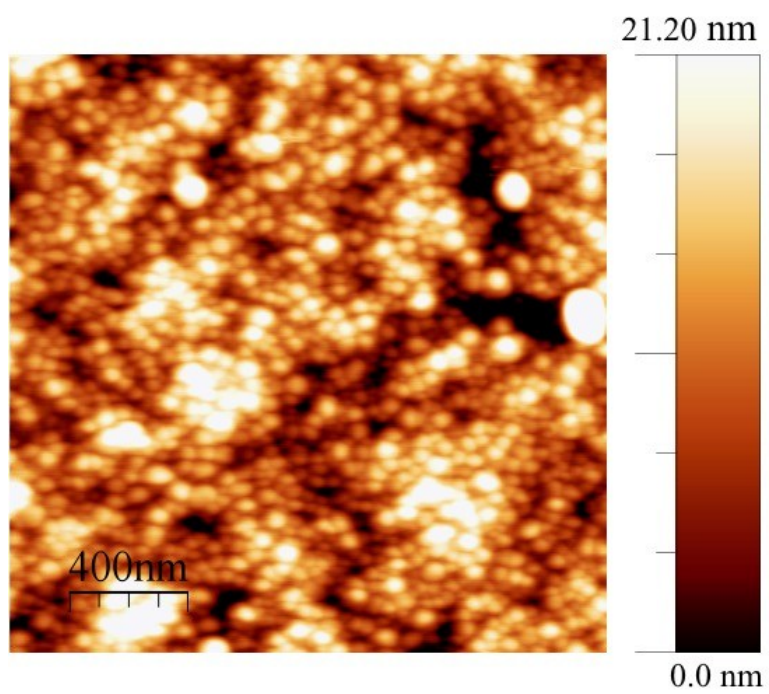

**Figure S6.** AFM image of polycrystalline  $\text{Fe}_{1.6}\text{Cr}_{0.4}\text{O}_3$  on FTO used for IPCE measurements.
